# Supplementary material
Source: MDPI journal article supplement (https://www.mdpi.com/2410-3888/8/8/392)
Supplement: s1 [file s1]

# Estuarine-Specific Migration of Glass Eels in the Ems Estuary

Jeroen B. J. Huisman <sup>1,2,\*</sup>, Henry J. Kuipers <sup>2</sup>, Leopold A. J. Nagelkerke <sup>1</sup>, Peter Paul Schollema <sup>3</sup>  
and Inge van der Knaap <sup>2</sup>

<sup>1</sup> Aquaculture & Fisheries Group, Wageningen University & Research, 6700 AH Wageningen, The Netherlands; leo.nagelkerke@wur.nl

<sup>2</sup> Coastal and Marine Systems group, Van Hall Larenstein University of Applied Sciences, 8901 BV Leeuwarden, The Netherlands; henry.kuipers@hvhl.nl (H.J.K.); inge.vanderknaap@hvhl.nl (I.v.d.K.)

<sup>3</sup> Water Authority Hunze en Aa's, 9640 AD Veendam, The Netherlands; p.schollema@hunzeenaas.nl

\* Correspondence: jeroen.huisman@hvhl.nl

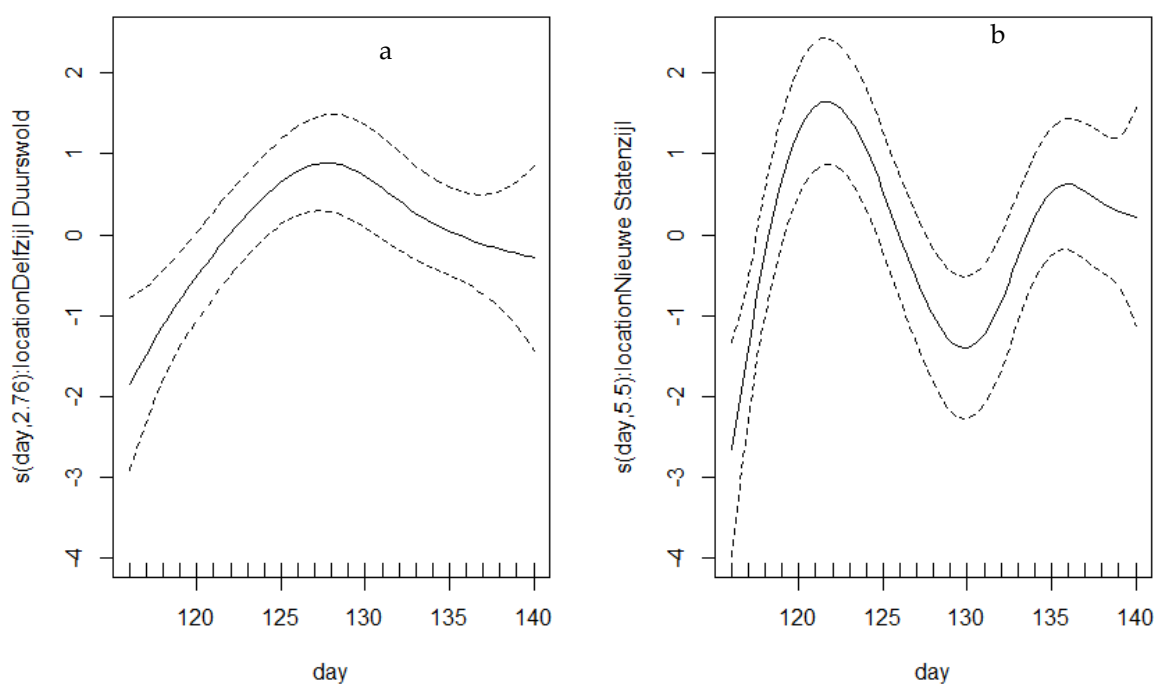

**Figure S1.** Predicted daily catch over days of the year at Delfzijl - Duurswold and Nieuwe Statenzijl.

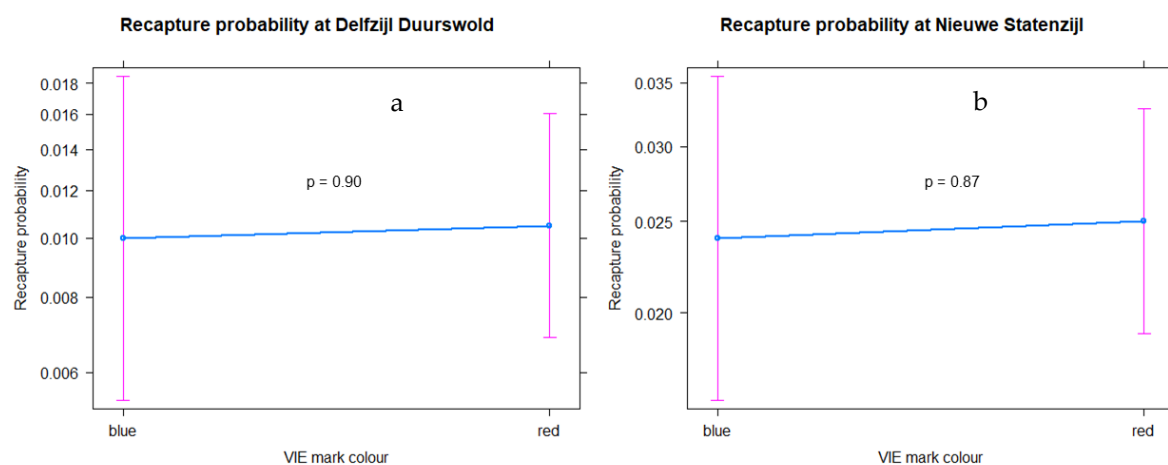

**Figure S2.** Recapture probability of VIE tagged blue and red eel at Delfzijl (a) and Nieuwe Statenzijl (b).

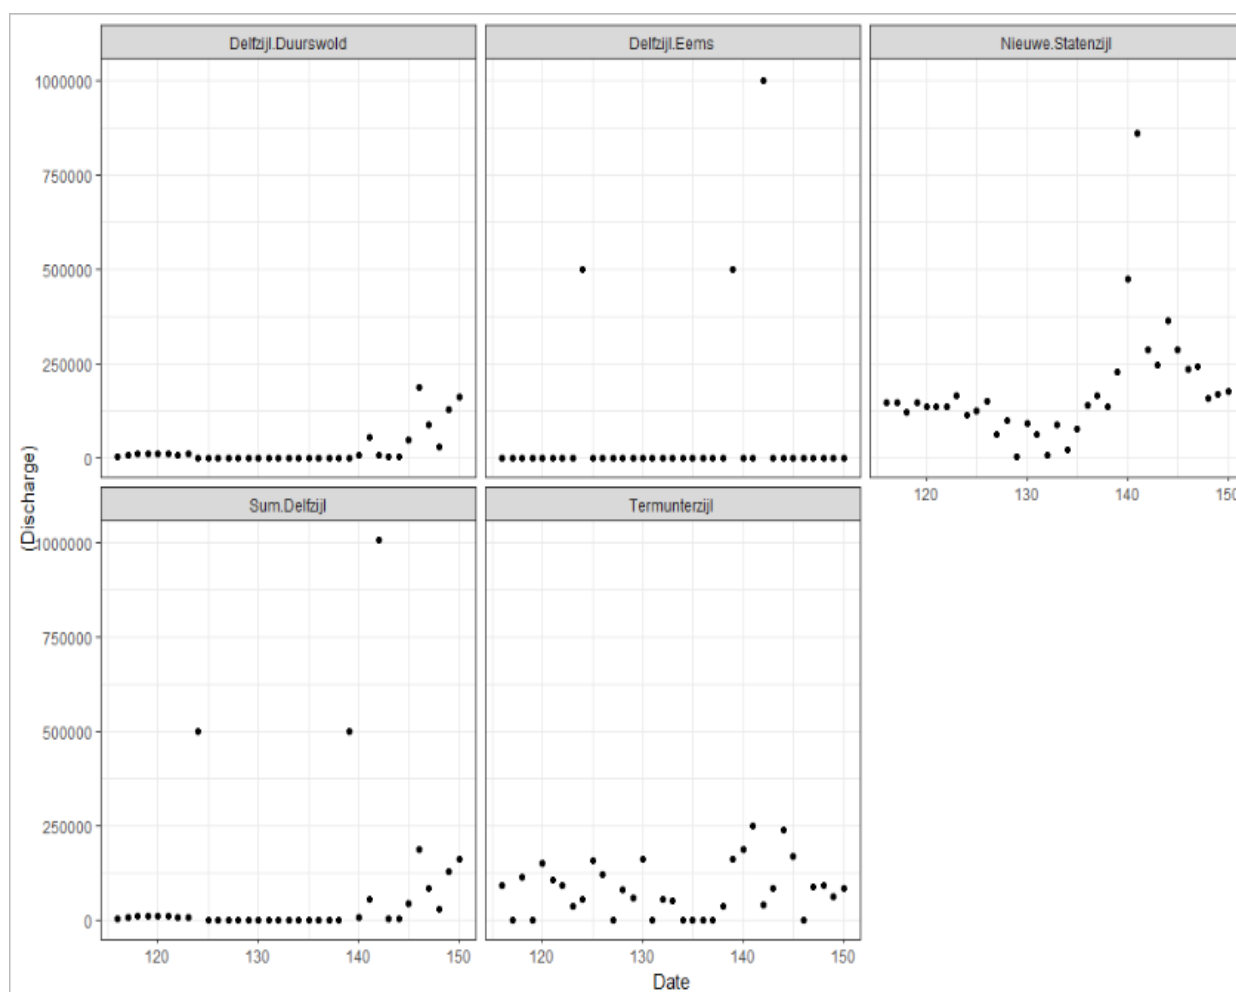

**Figure S3.** Daily discharge at Delfzijl, Nieuwe Statenzijl, total discharge at Delfzijl and Termunterzijl.

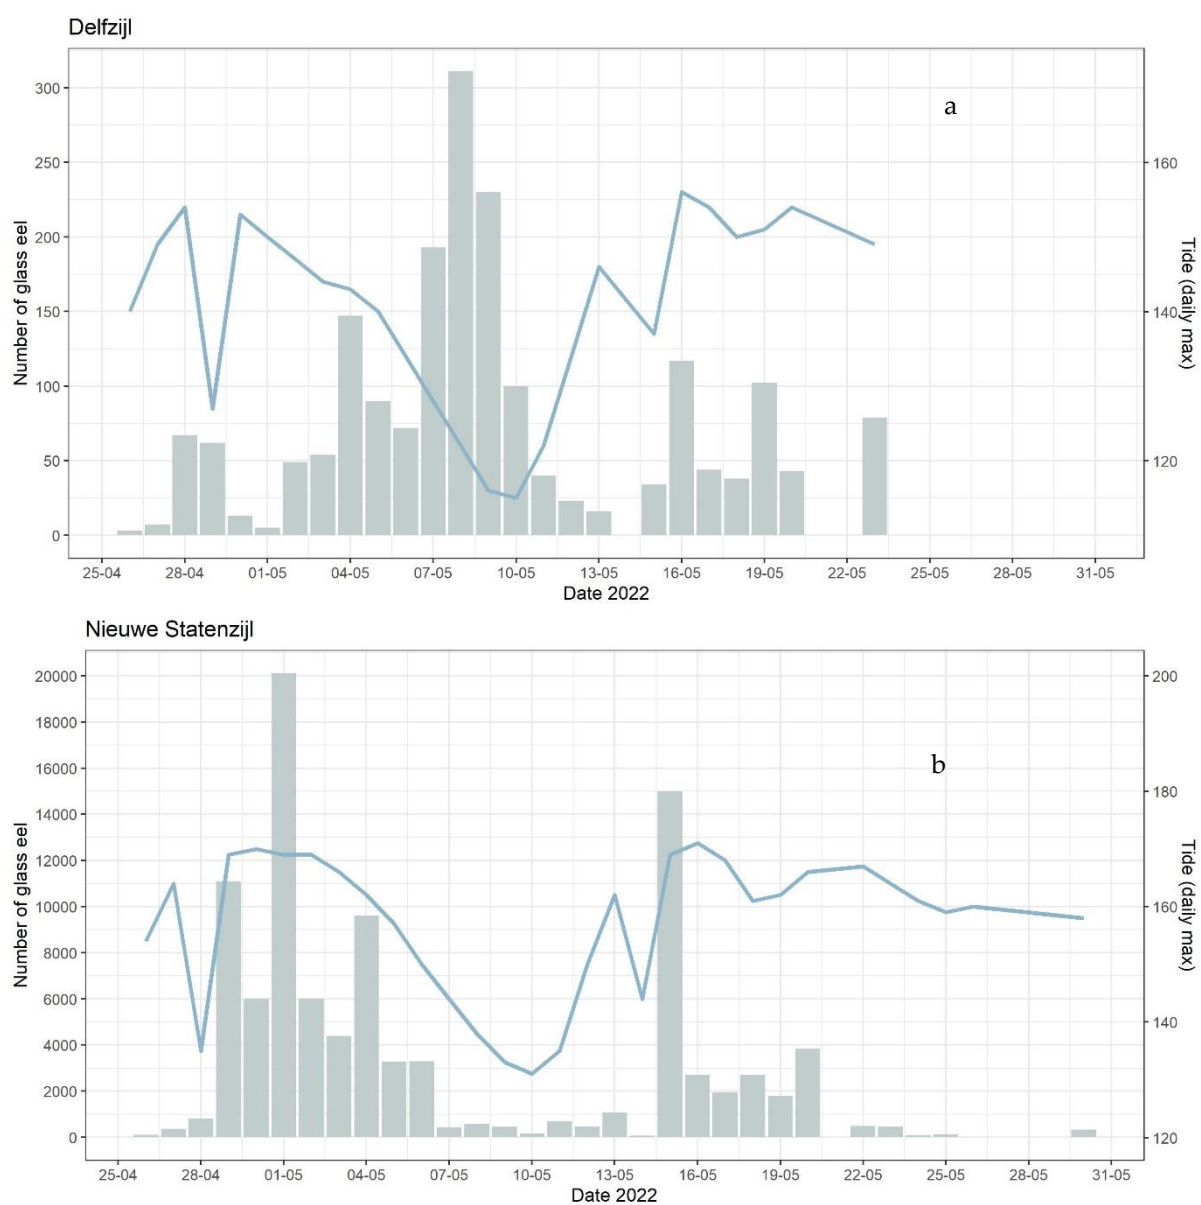

**Figure S4.** Daily number of glass eels caught at Delfzijl (a) and Nieuwe Statenzijl (b), and daily tidal difference (cm).
